# Supplementary material for: c-MYC and reactive oxygen species play roles in tetrandrine-induced leukemia differentiation
Source: PubMed Central journal article supplement (PMC5920096; doi:10.1038/s41419-018-0498-9), 2018-04-27
Supplement: 41419_2018_498_MOESM1_ESM.pdf [file 41419_2018_498_MOESM1_ESM.pdf]

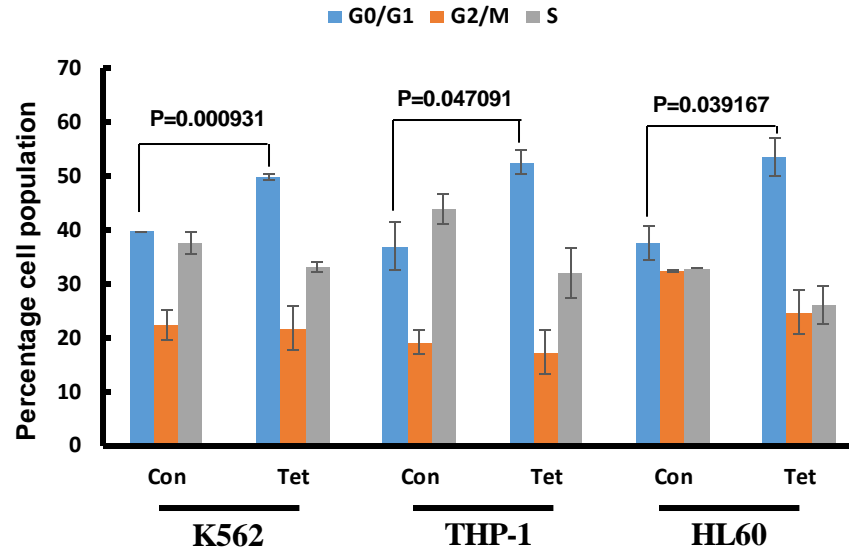

**Figure S1.** Cell cycle was analyzed by flow cytometry after DMSO or 2 $\mu$ M tetrandrine treatment for 48h, the statistic analysis for three experiments. The bars indicate the S.D.

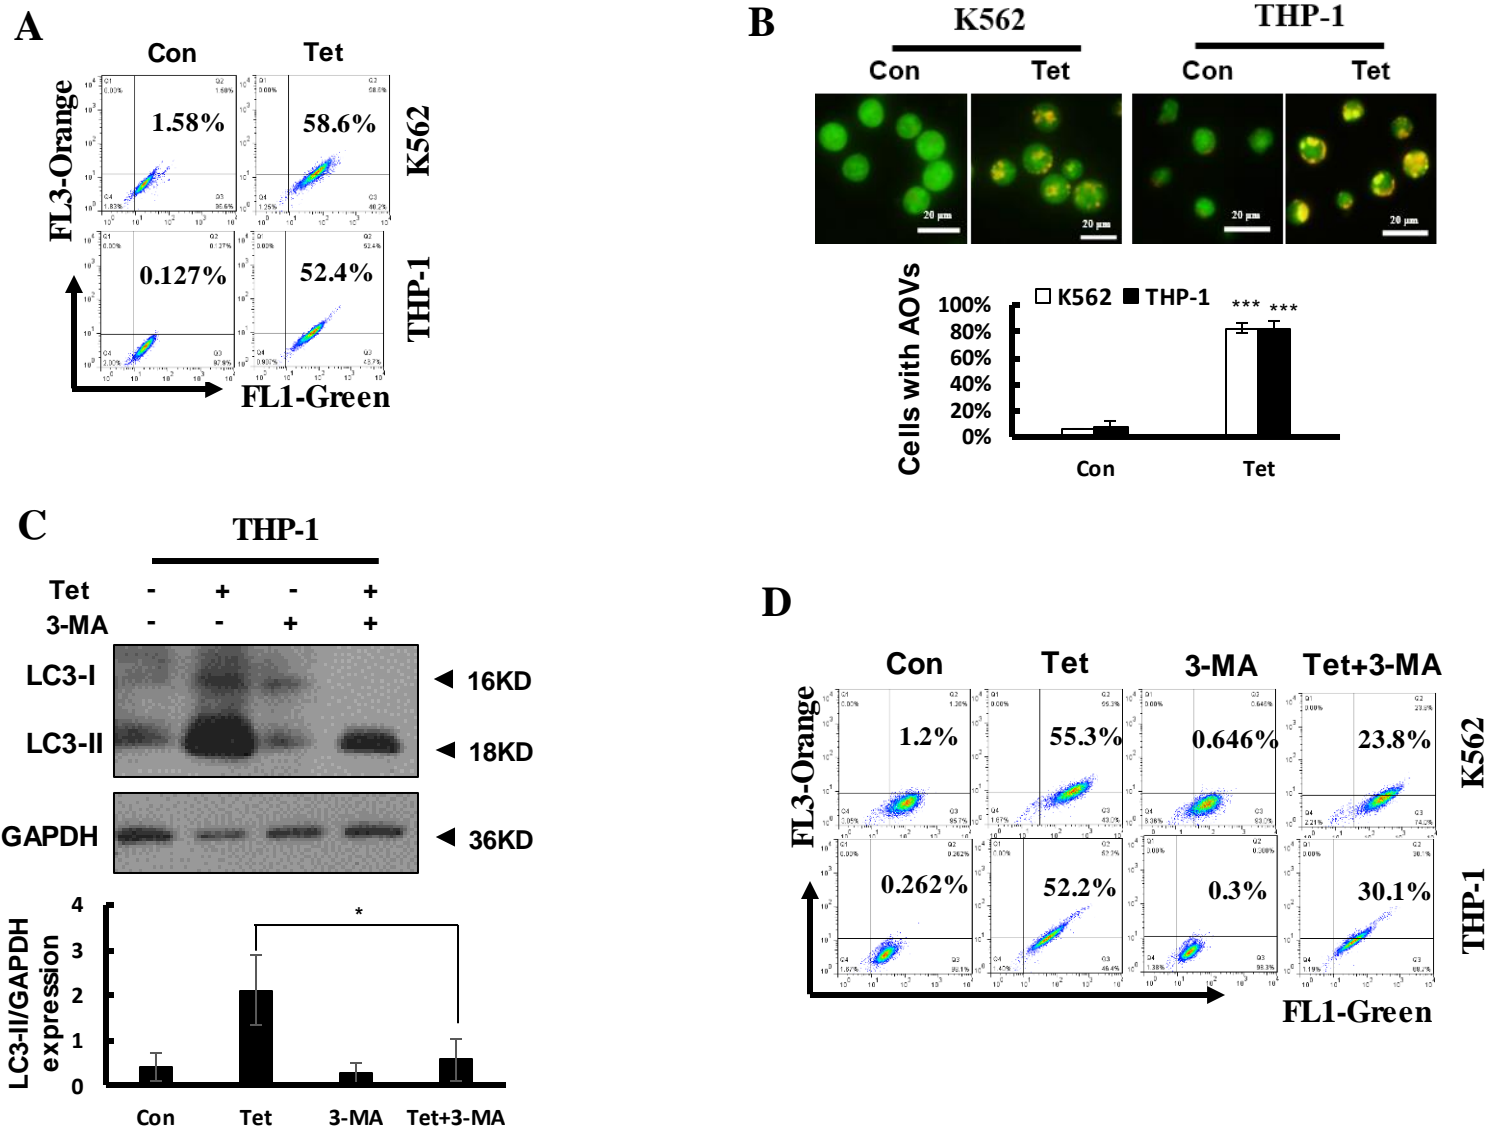

**Figure S2**

**E**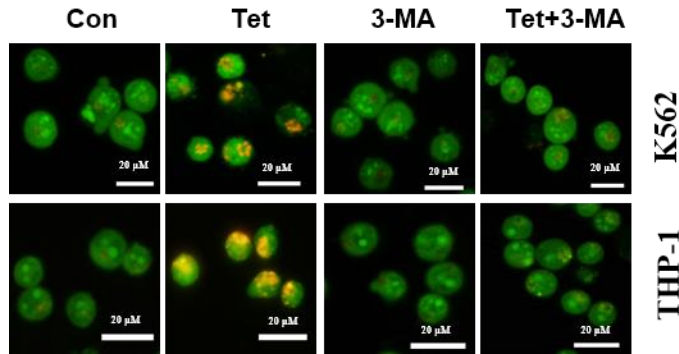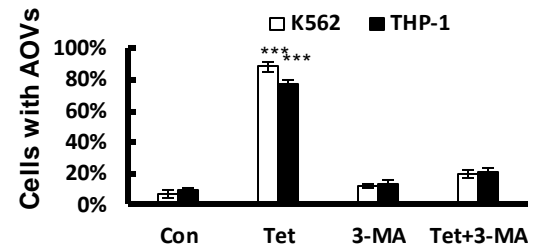**F**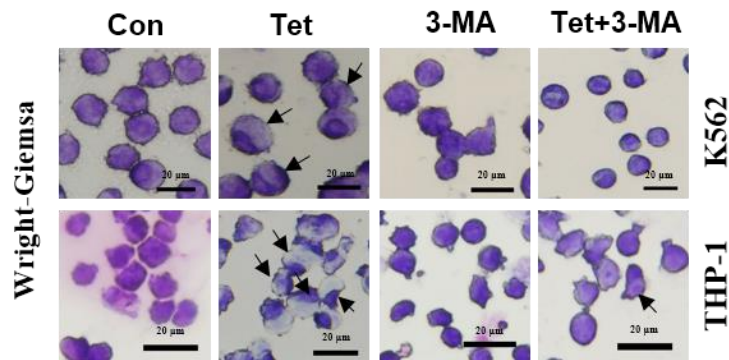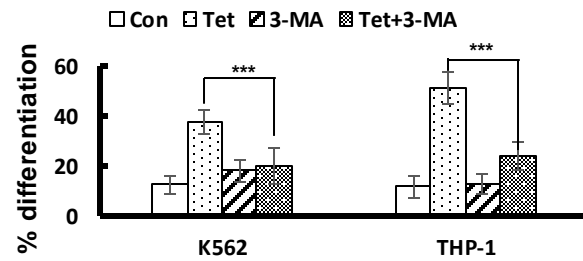**Figure S2**

**Figure S2.** The bars indicate the S.D. \*p <0.05, \*\*\*p <0.001. A, B, After 24h of DMSO or 2 $\mu$ M Tetrandrine treatment the cells were stained with acridine orange, then analyzed by flow cytometry or visualized by fluorescence microscopy. C. THP-1 cells were treated for 9 h with or without pretreatment 1.5 mM 3-MA for 1 h. Western blot analysis of LC3 levels. D, E. Cells were treated with DMSO or 2 $\mu$ M Tetrandrine for 24h with or without pretreatment with 1.5mM 3-MA for 1h, the light or orange autophagosomes were analyzed by flow cytometry or visualized by fluorescence microscopy. F. Wright-Giemsa staining was used to assess cell morphology after 4 days of treatment with or without pretreatment 1.5 mM 3-MA for 1 h. The arrows indicate lower nucleus/cytoplasm ratio and the cells with horseshoe shape nuclei.

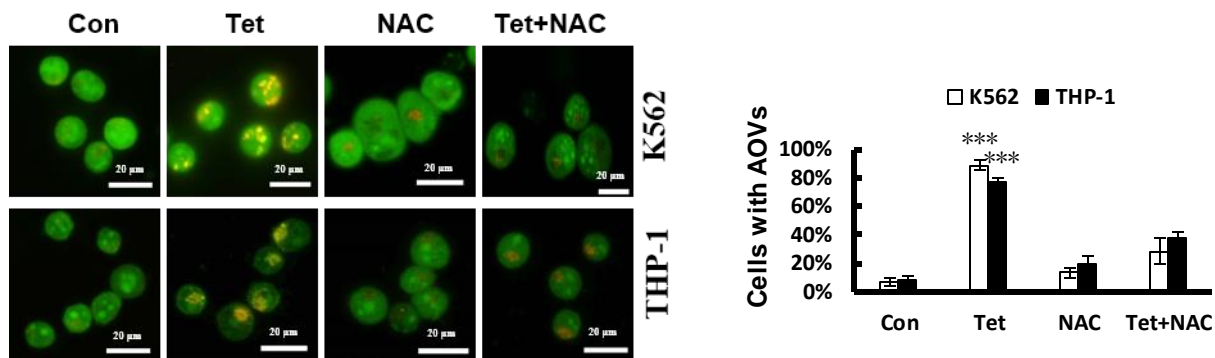

**Figure S3.** The bars indicate the S.D. \*\*\* $p < 0.001$ . Cells were treated with DMSO or 2 $\mu$ M Tetrandrine for 24h with or without pretreatment with NAC for 1h, stained with acridine orange then visualized by fluorescence microscopy.

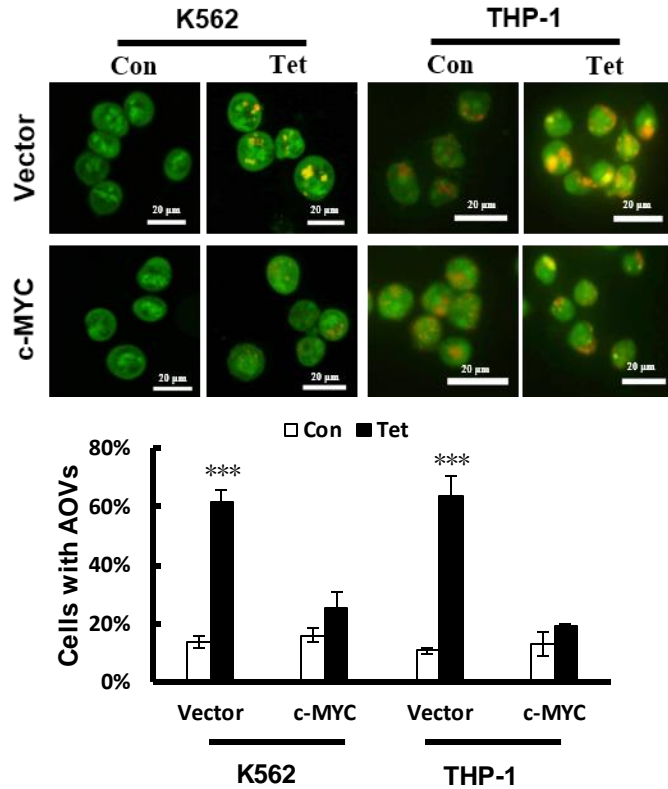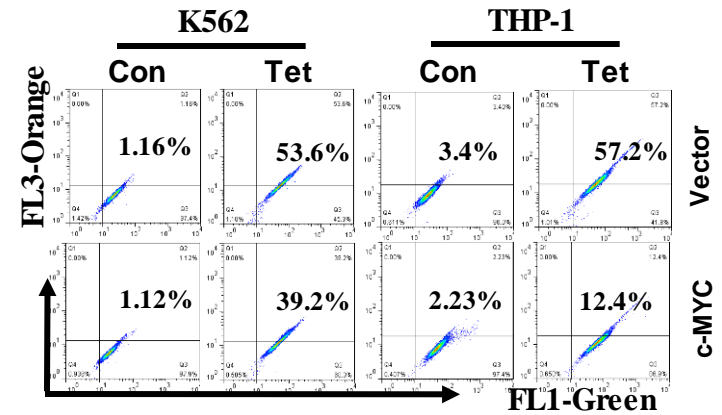

**Figure S4.** The bars indicate the S.D. \*\*\*p < 0.001. THP-1 vector or c-MYC cells were treated with DMSO or 2 μM Tetrandrine for 24h. The light or orange autophagosomes were observed by fluorescence microscopy or by flow cytometry.

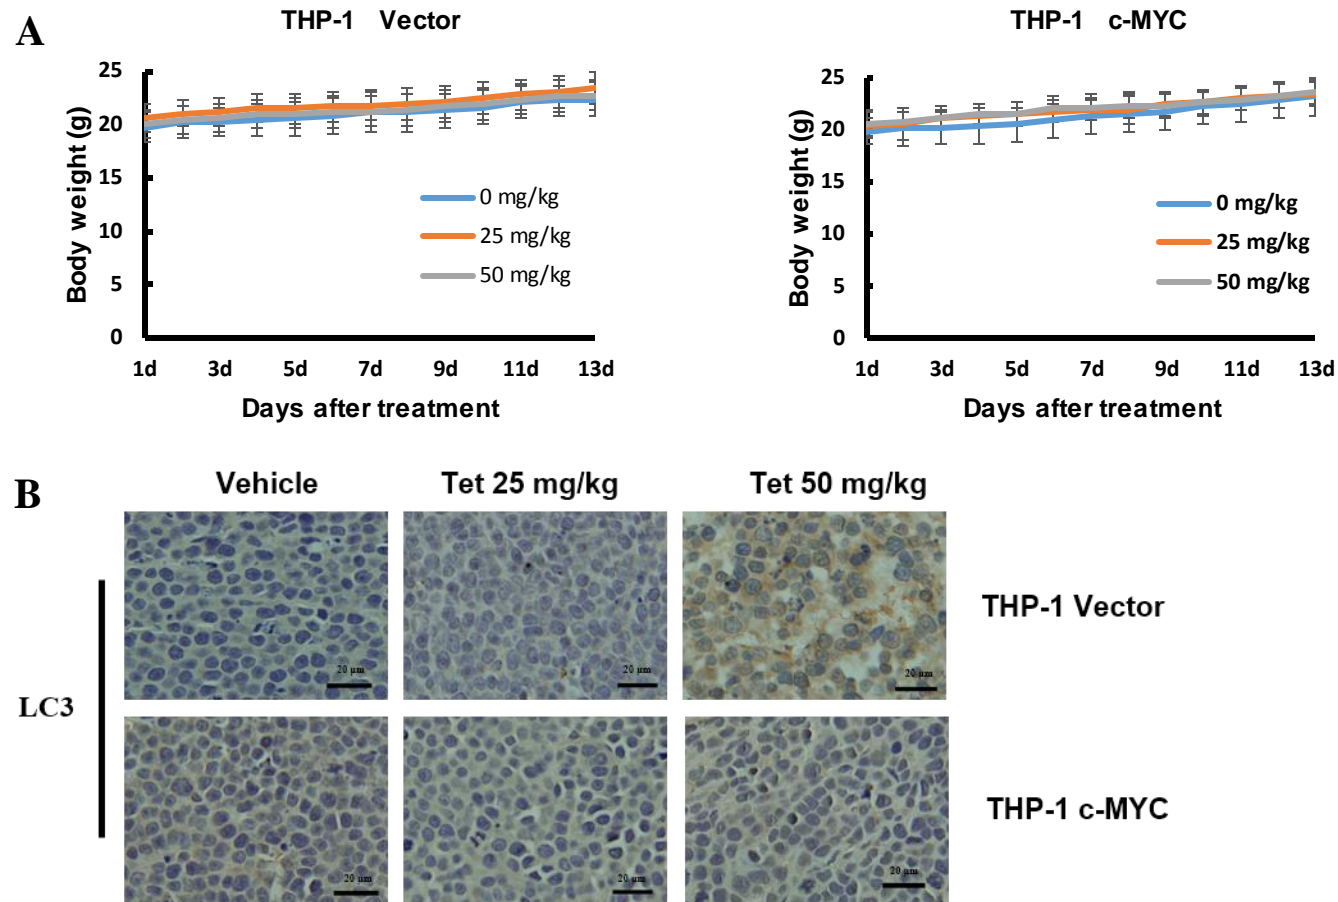

**Figure S5.** A. Body weights of nude mice bearing established THP-1 vector and THP-1 c-MYC tumor xenografts. B. LC3 was evaluated by immunohistochemistry analysis in tumor tissues. Magnification:  $\times 400$ .

**A**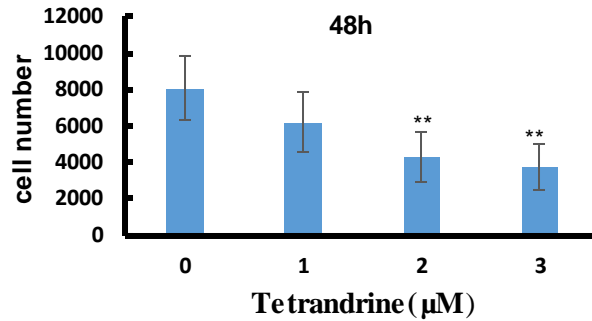**B**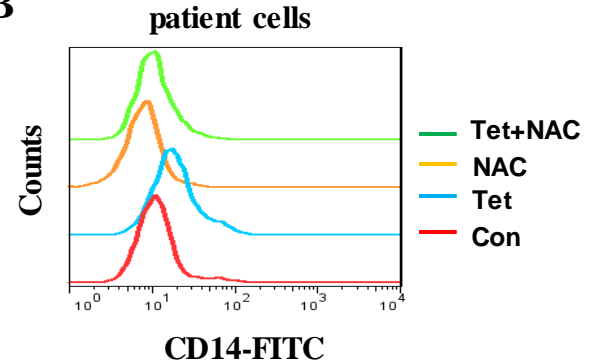**C**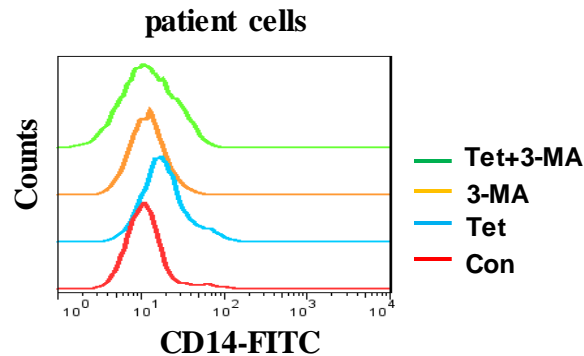

**Figure S6.** A. Patient's cells were treated with tetrandrine (0, 1, 2, or 3 μM) for 48 h and then cell proliferation was assessed using a cell counting method. \*\* $p < 0.01$ . B,C. After 3 days of DMSO or 2 μM tetrandrine treatment, flow cytometry analyzed CD14 expression with or without pretreatment with 15mM NAC or 1.5 mM 3-MA.



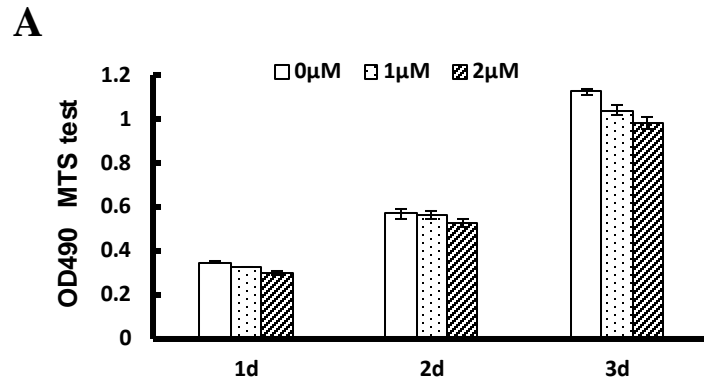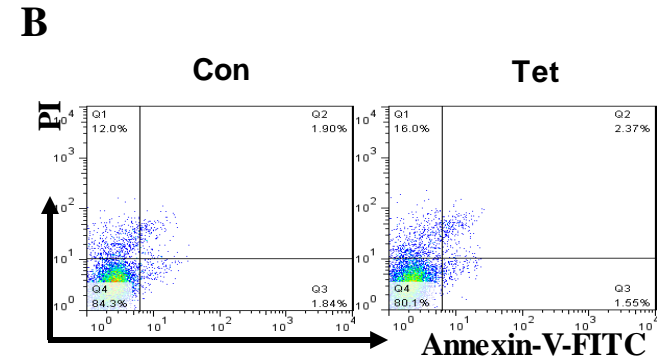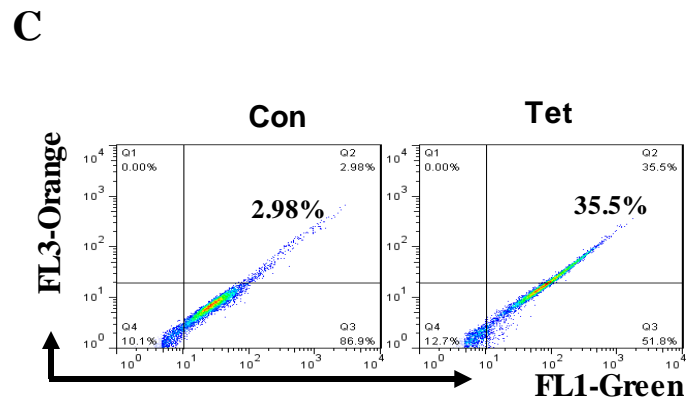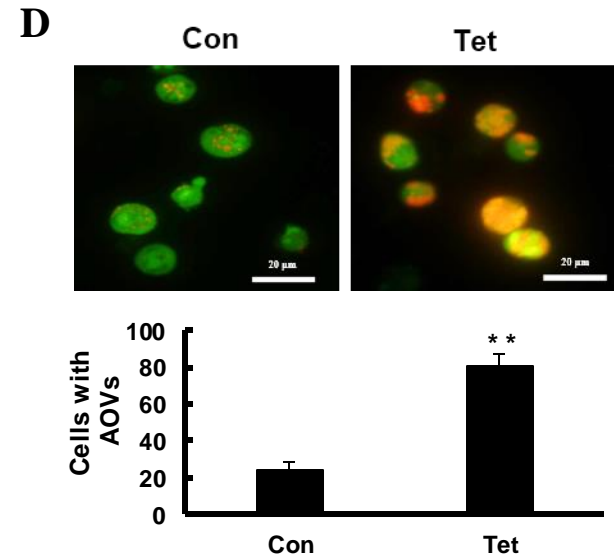

**Figure S7**

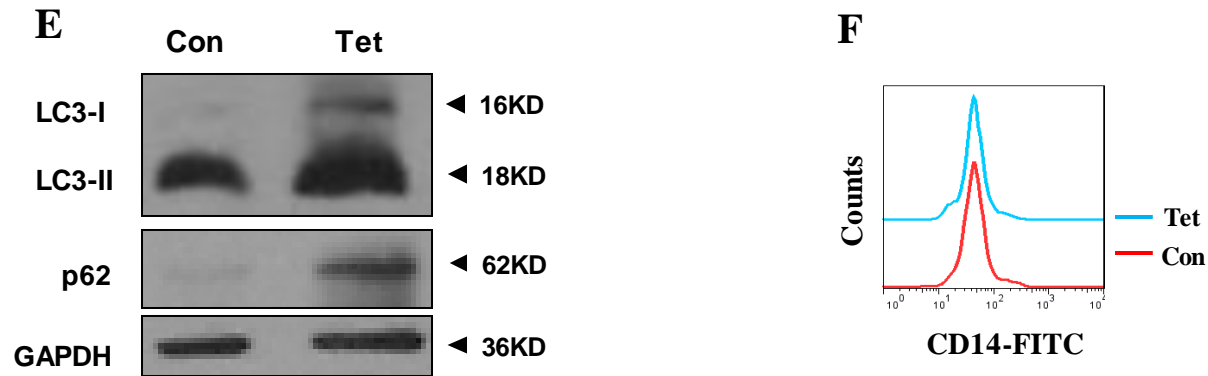

**Figure S7.** The bars indicate the S.D. A. MTS analysis was performed to determine cell viability. B. Apoptotic cells were detected by flow cytometry in DMSO or 2  $\mu$ M tetrandrine-treated mouse HSCs. C,D. After 24 h of DMSO or 2  $\mu$ M tetrandrine treatment, cells were stained with acridine orange and analyzed by flow cytometry or visualized by fluorescence microscopy. n=3. \*\*p<0.01. E. Western blot analysis is shown for LC3, p62 and GAPDH. F. The expression of CD14 in mouse HSCs was measured by flow cytometry after treated with DMSO or 2  $\mu$ M tetrandrine for 4 days.
